# Supplementary material
Source: PubMed Central journal article supplement (PMC3483364)

# Figure S1

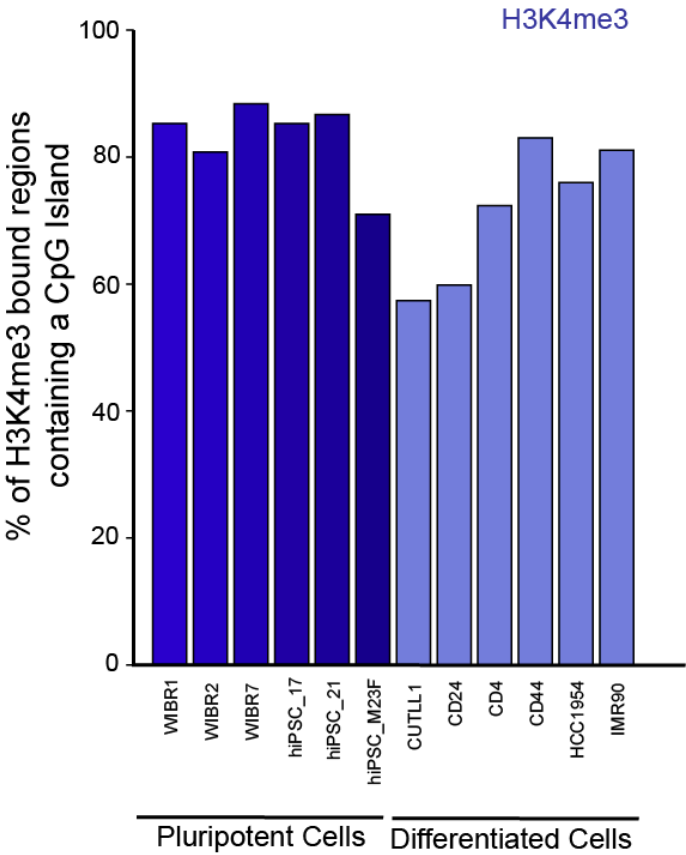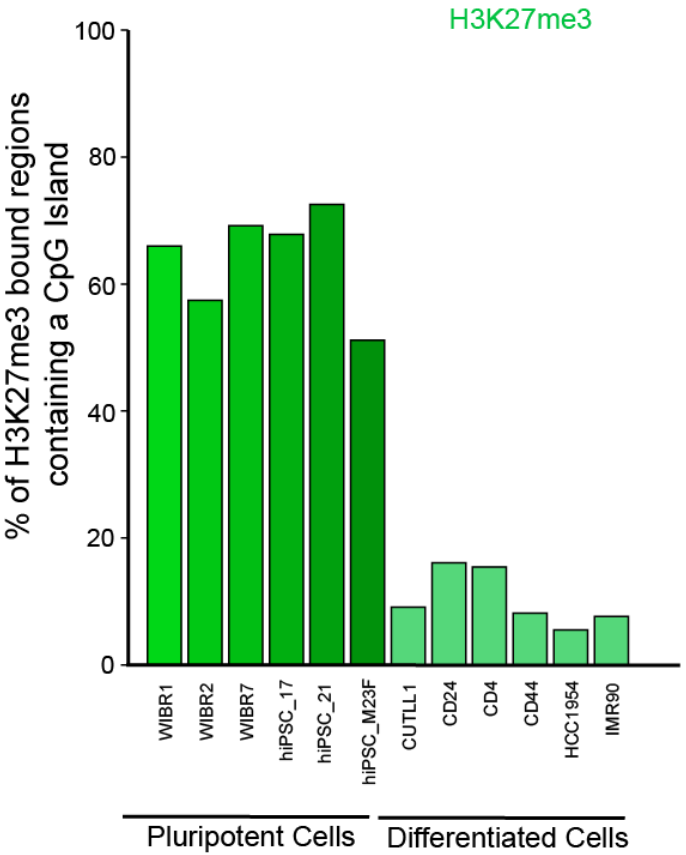

Supplement: NIHMS403526-supplement-01.pdf [file NIHMS403526-supplement-01.pdf]

# Figure S2

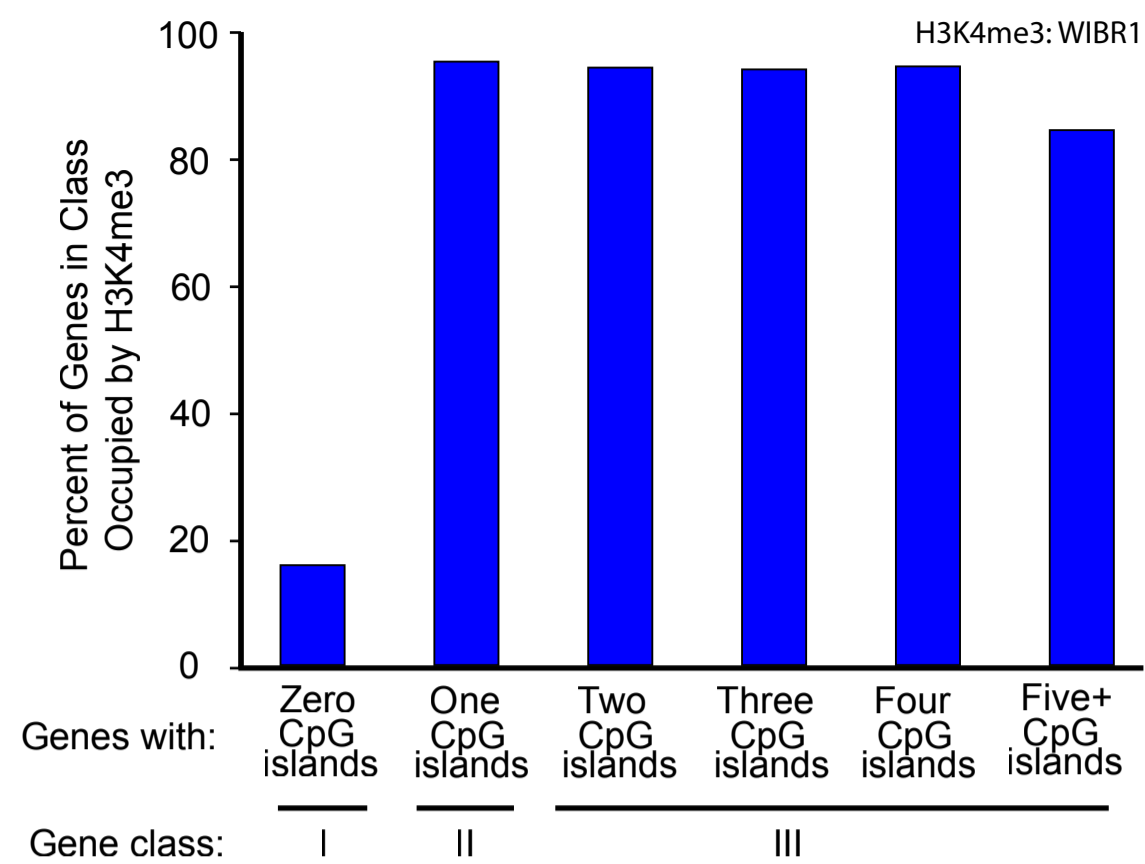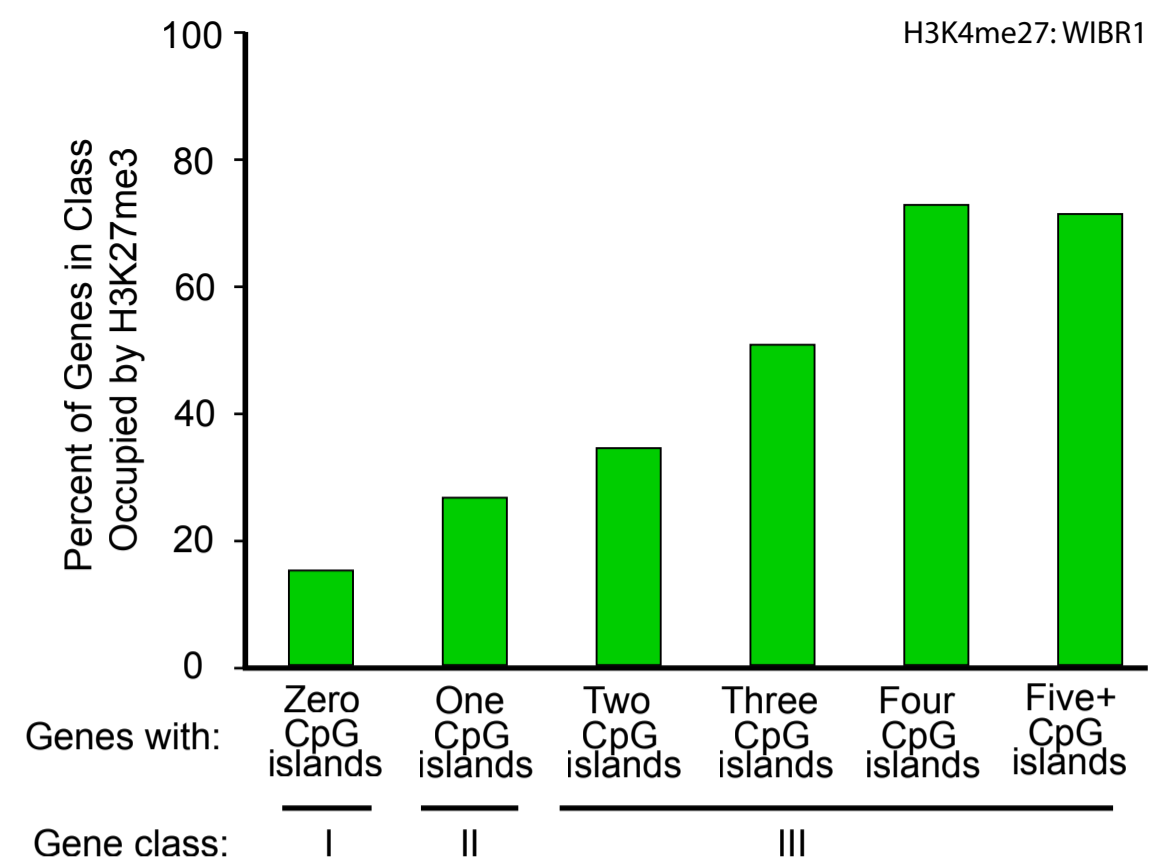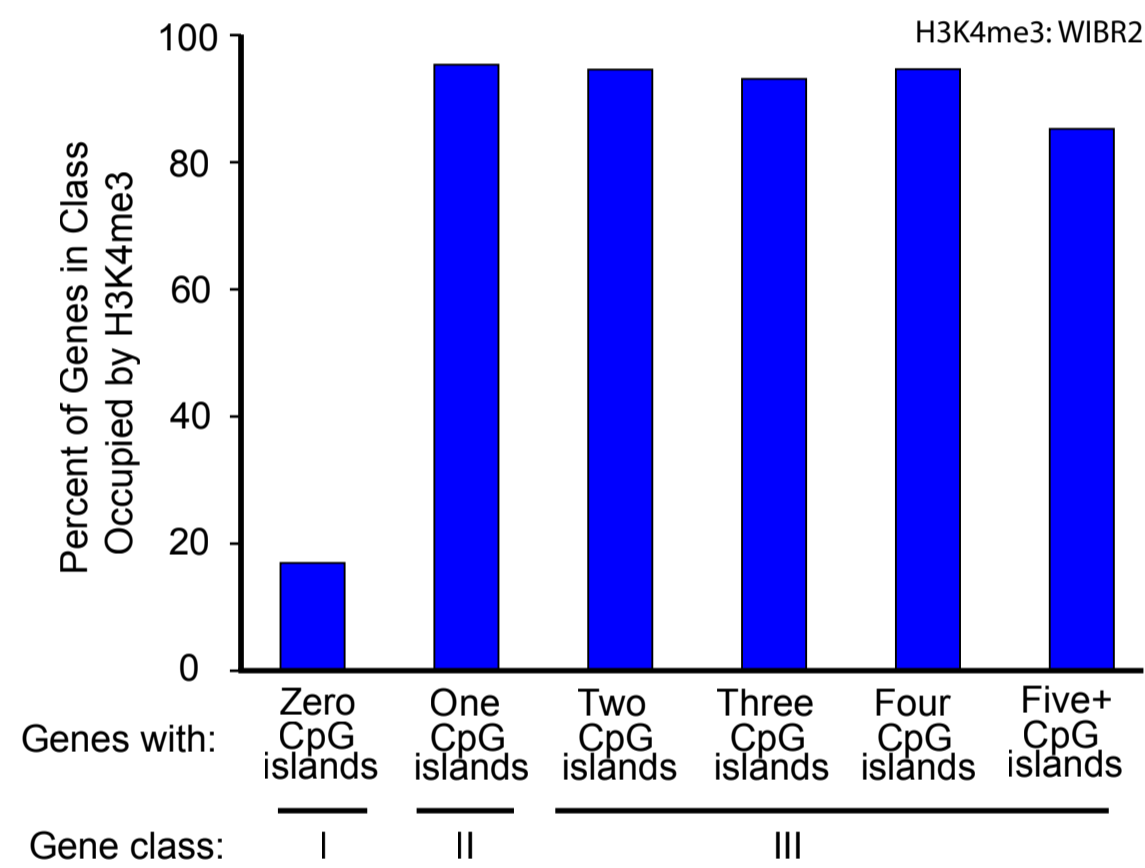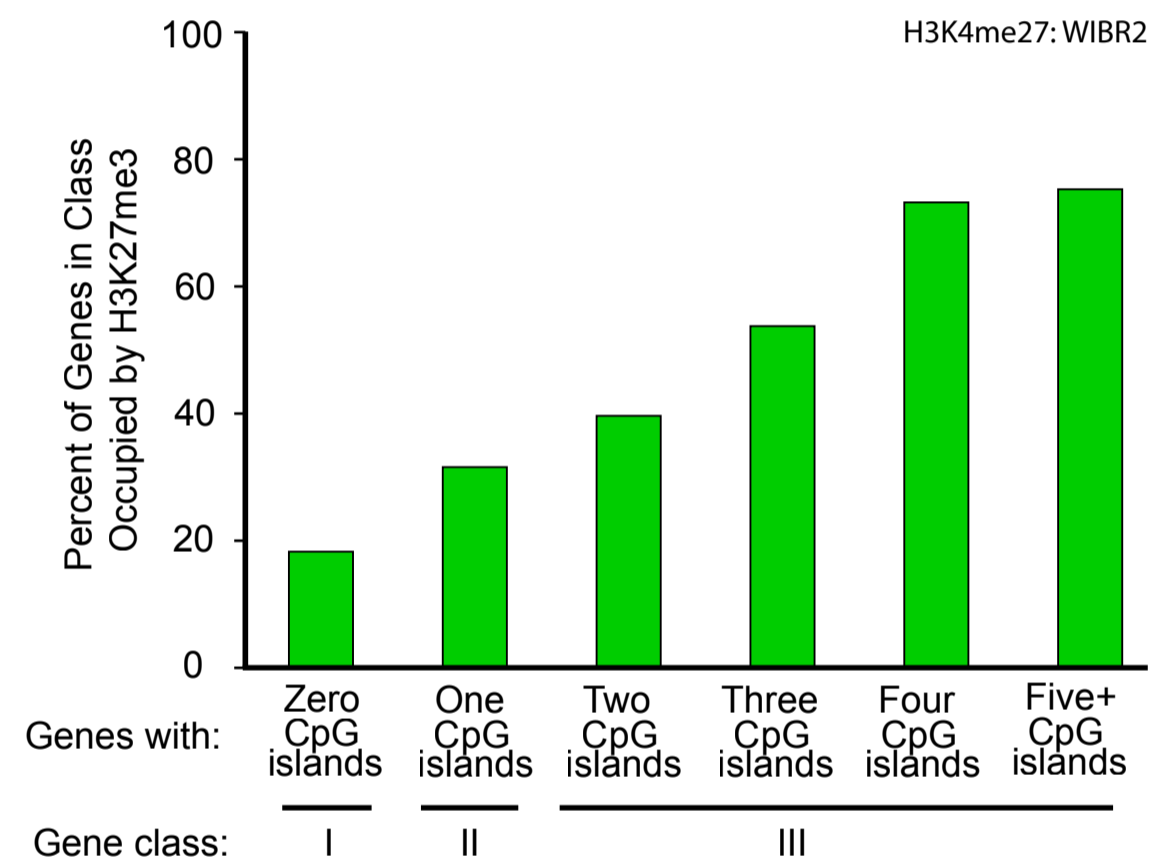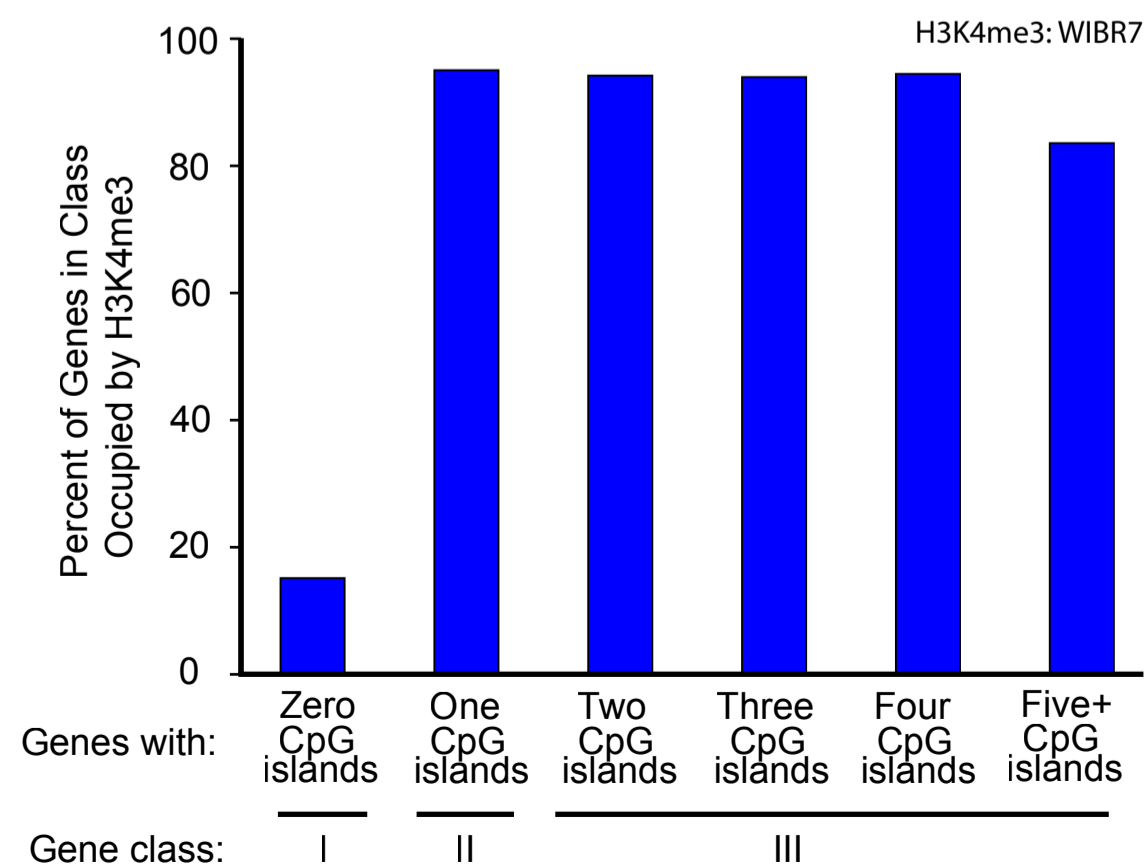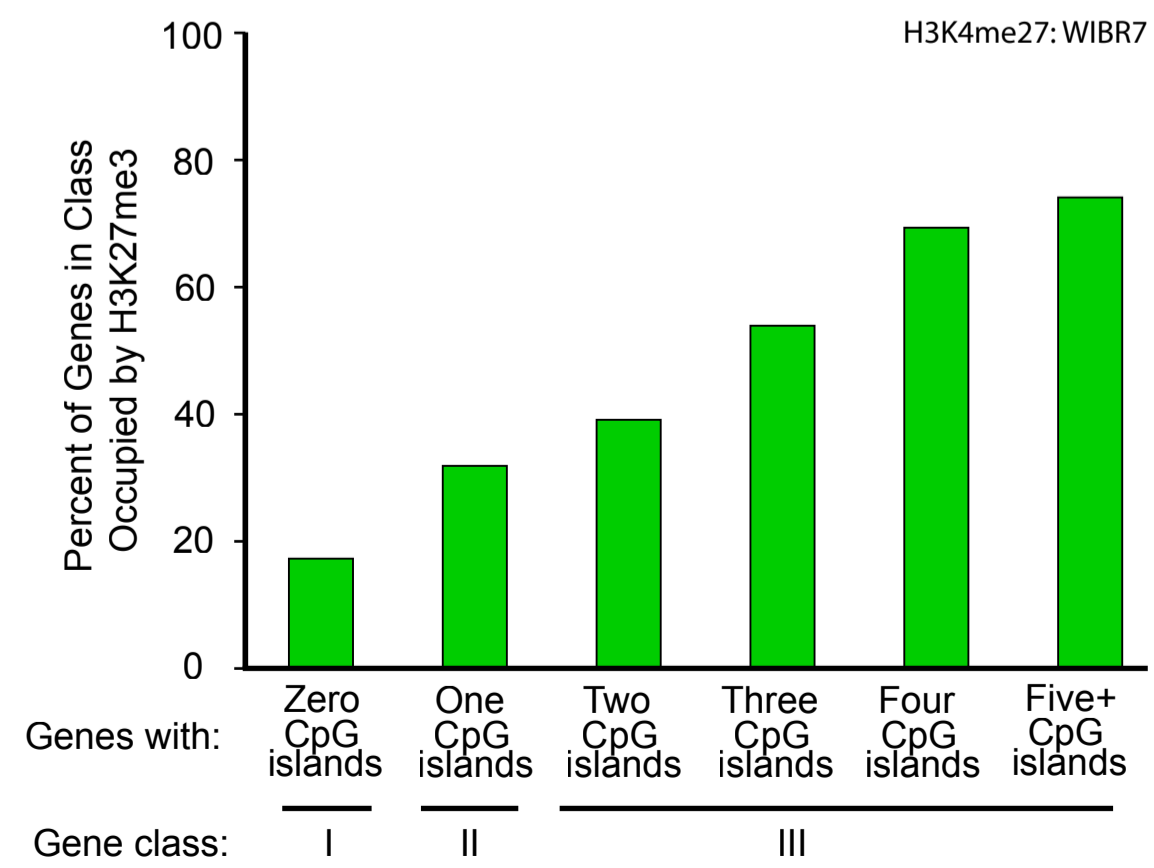

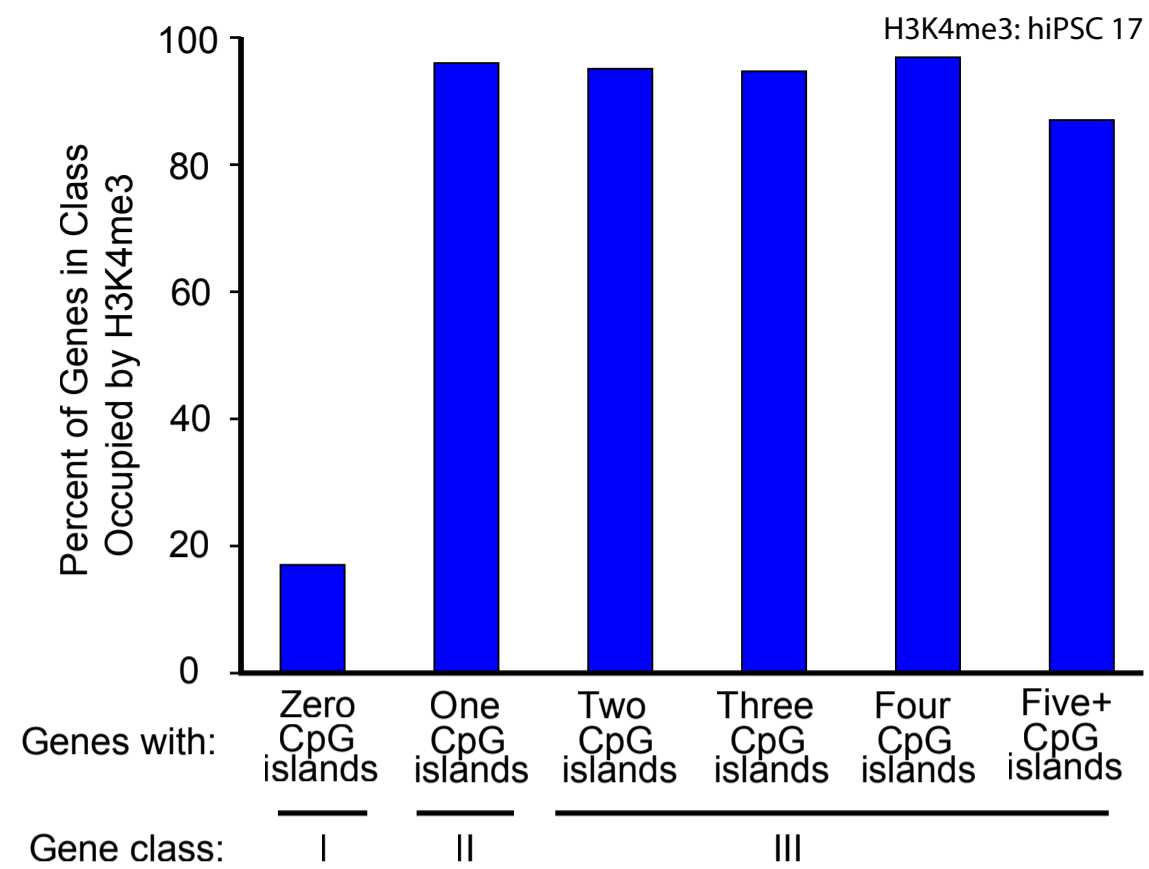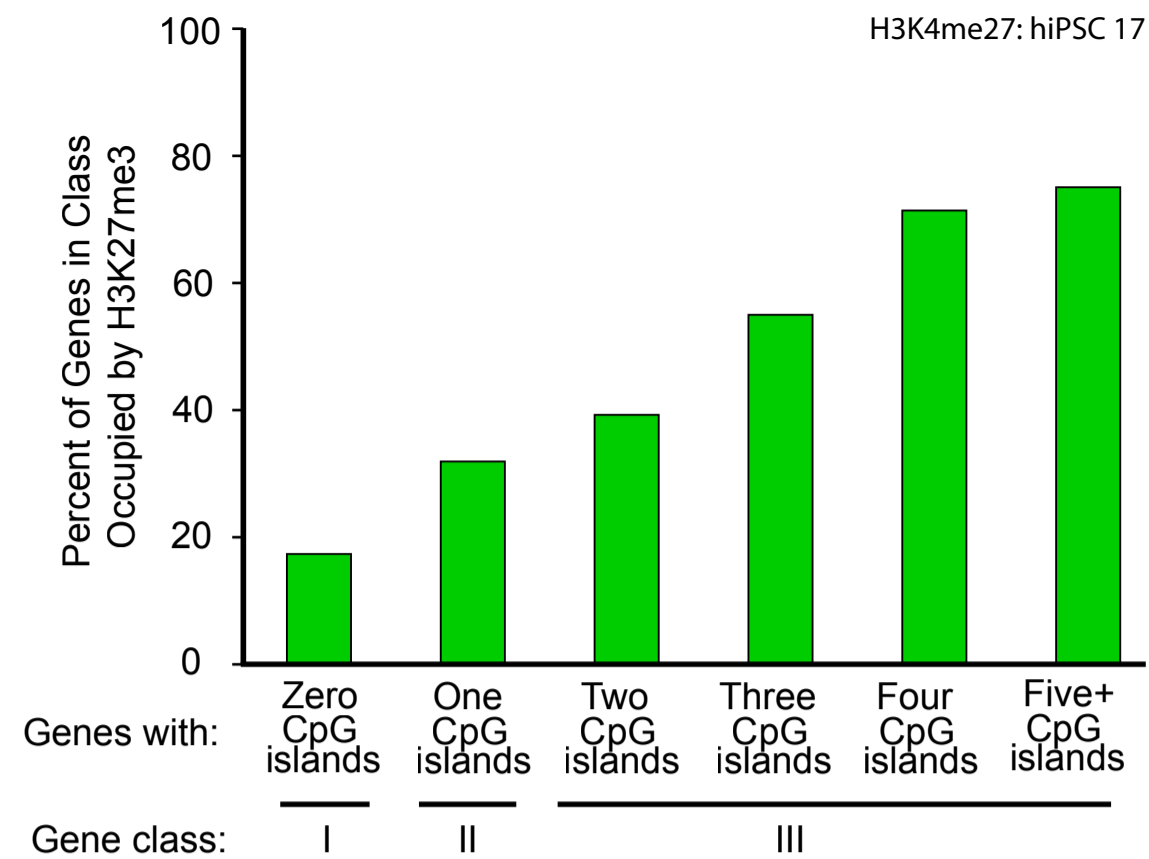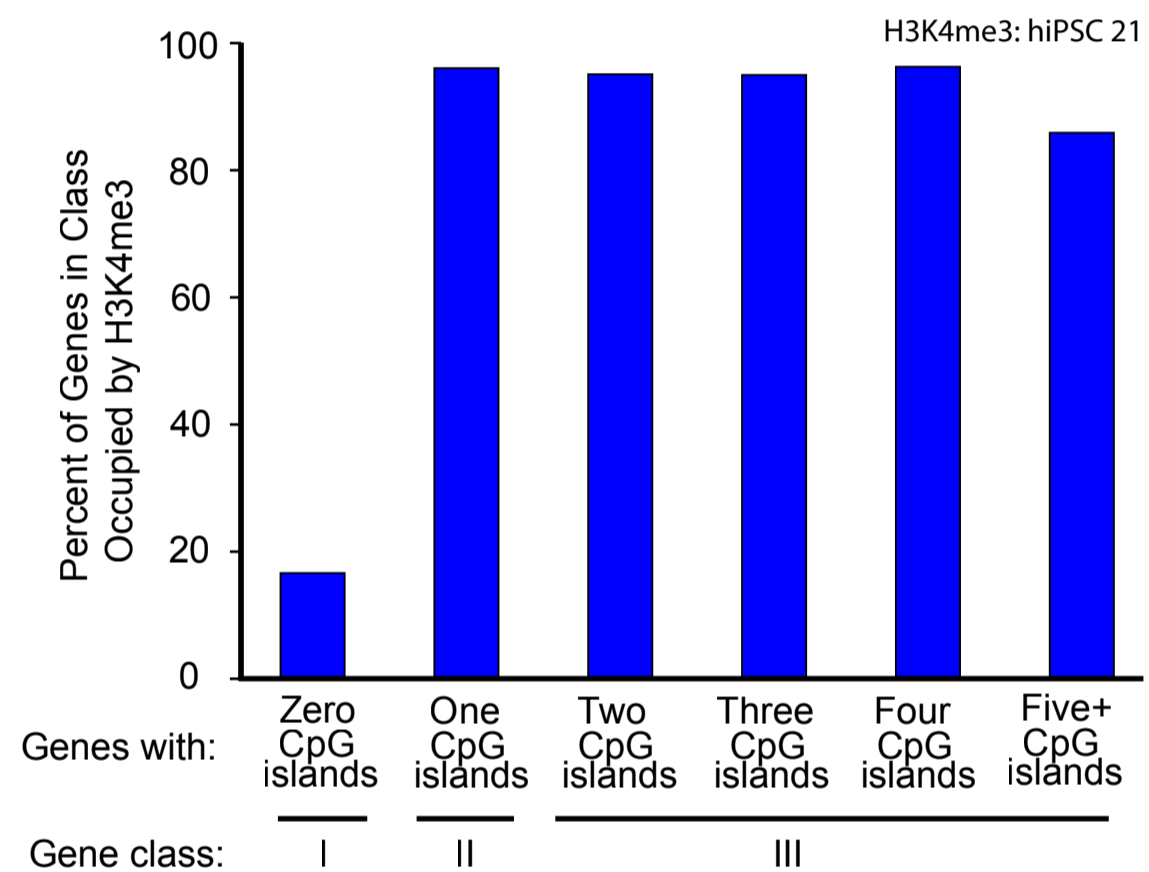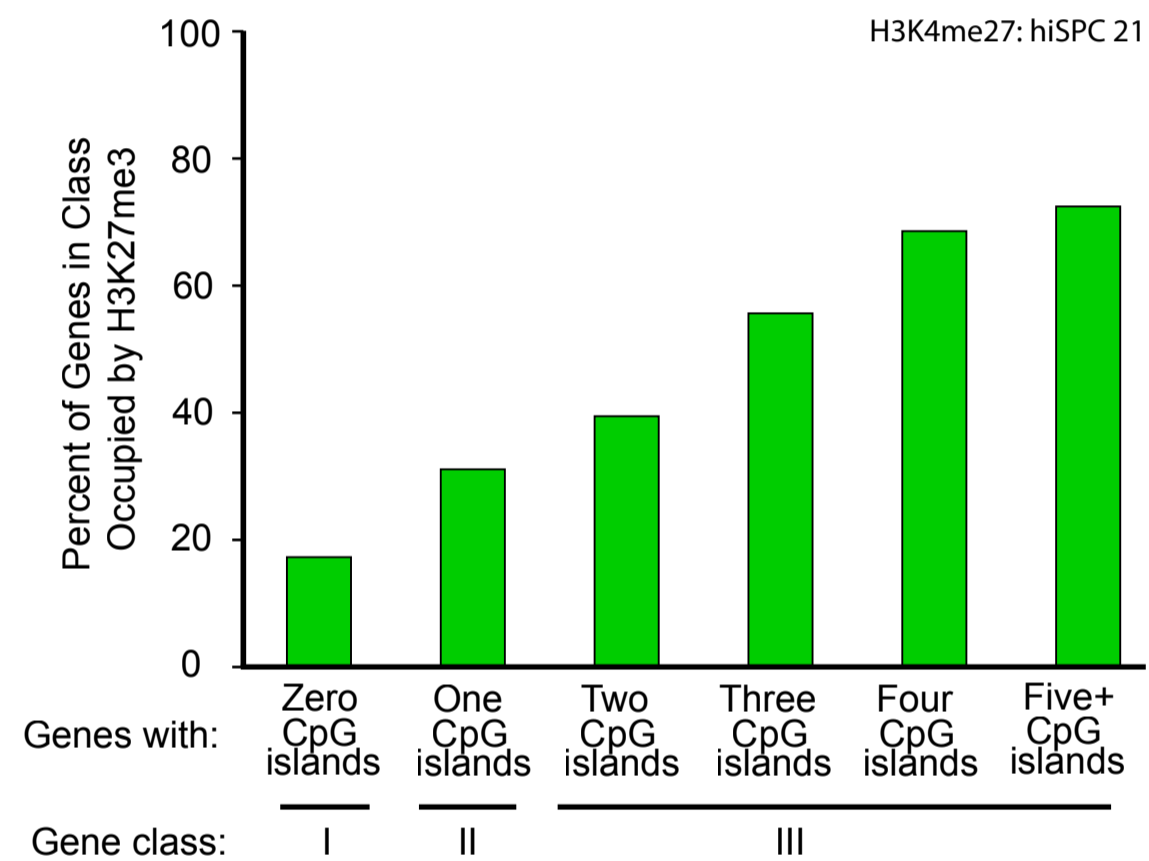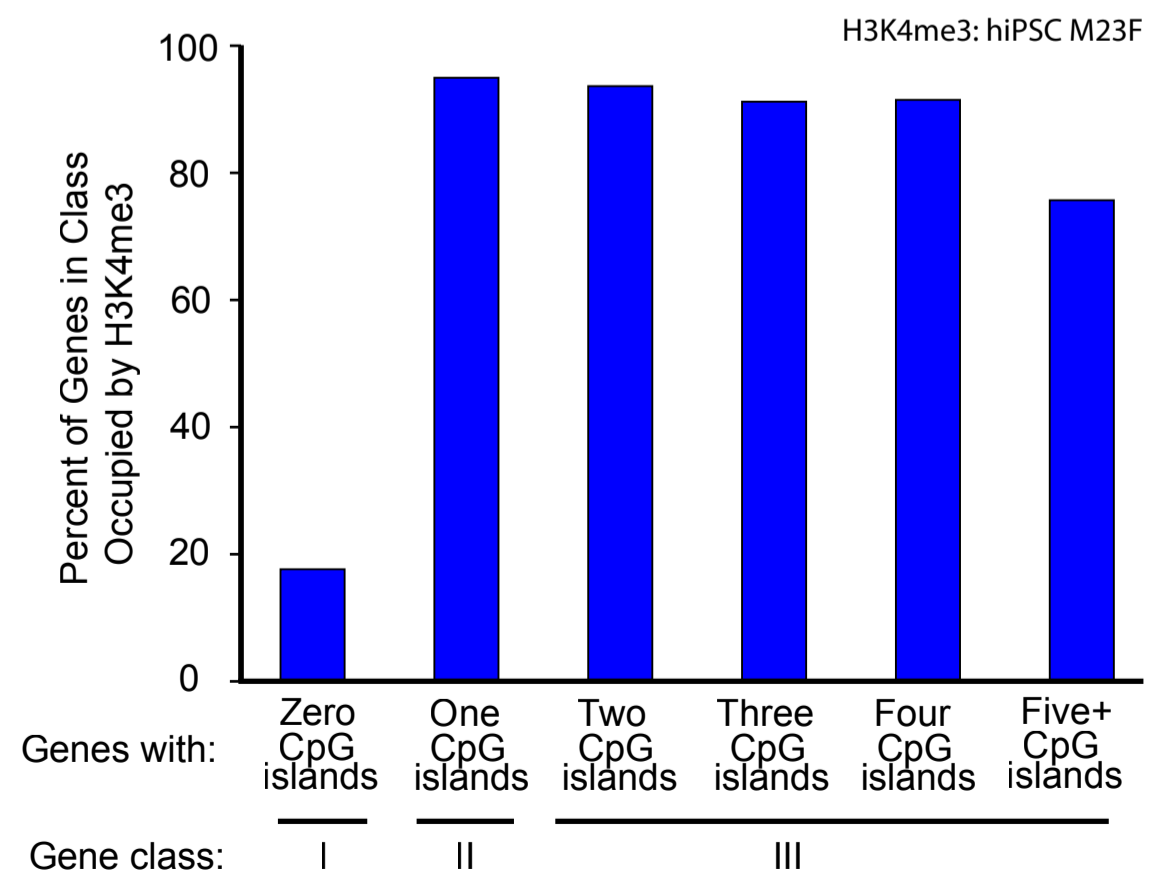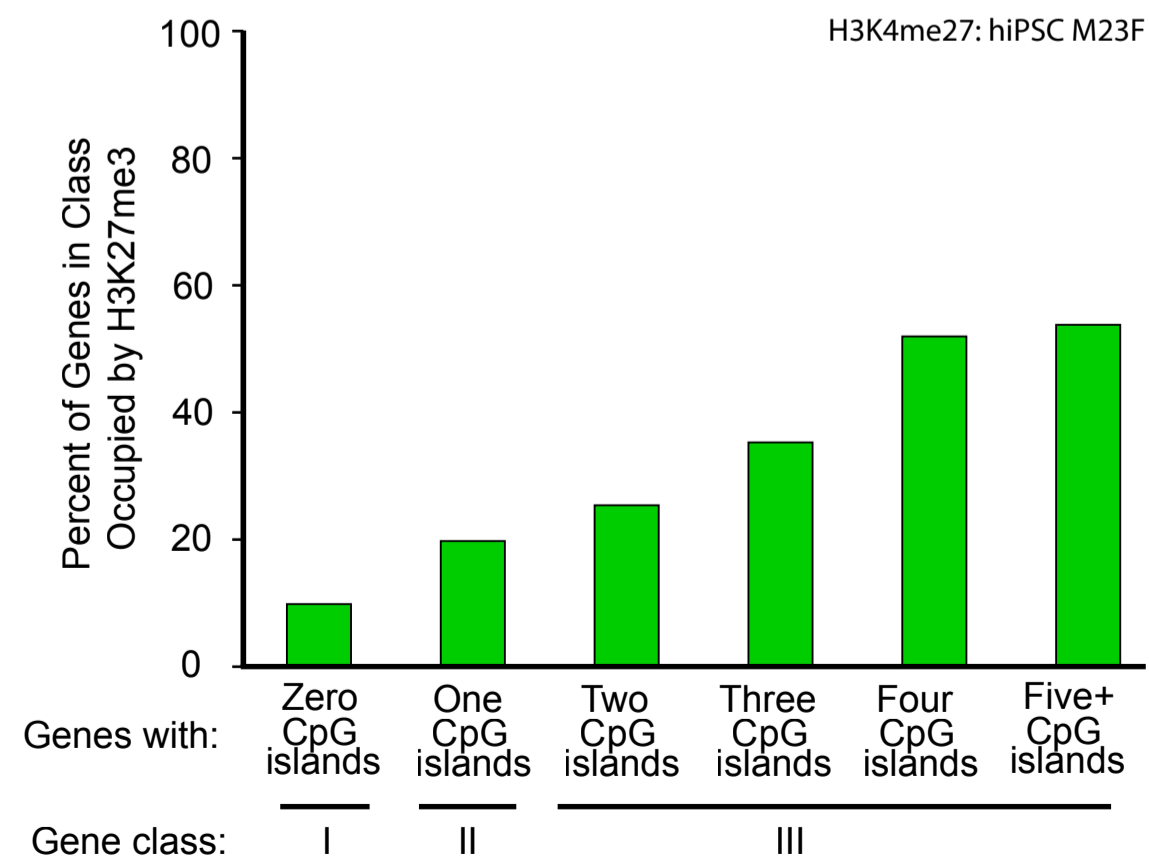

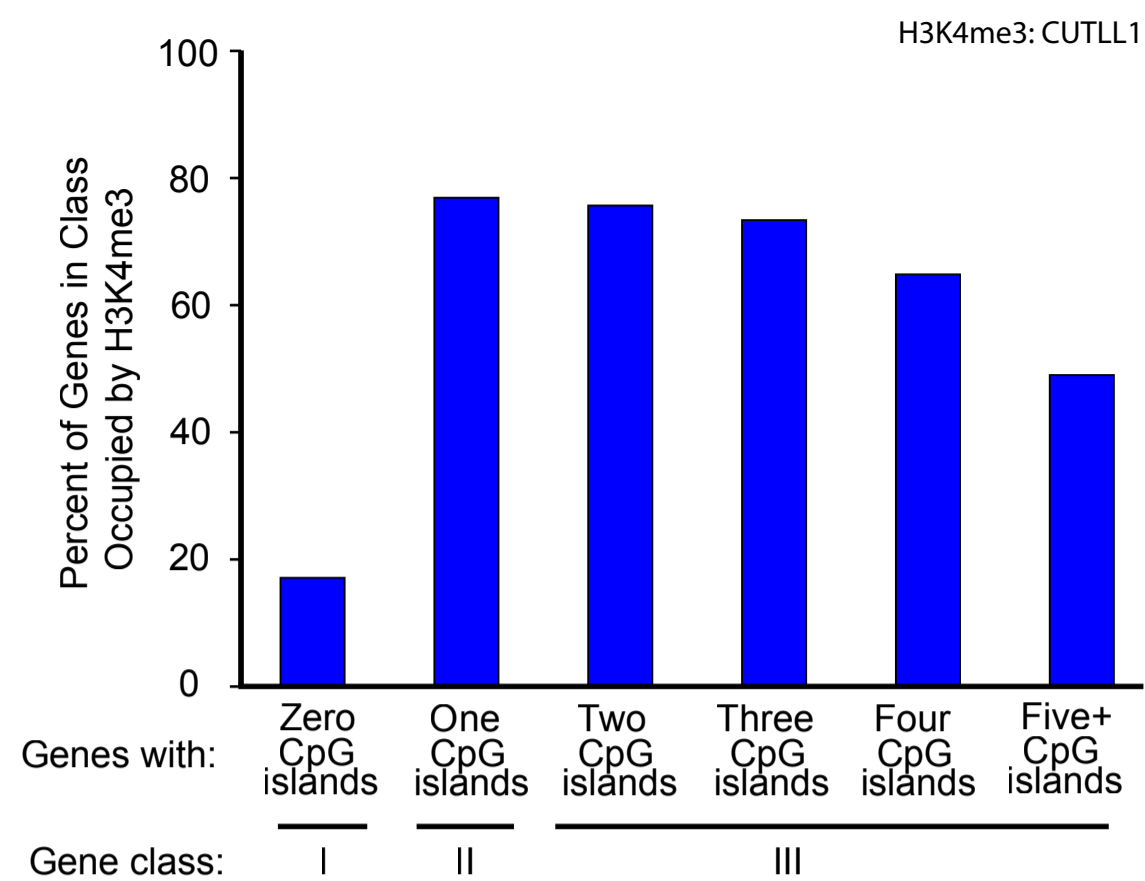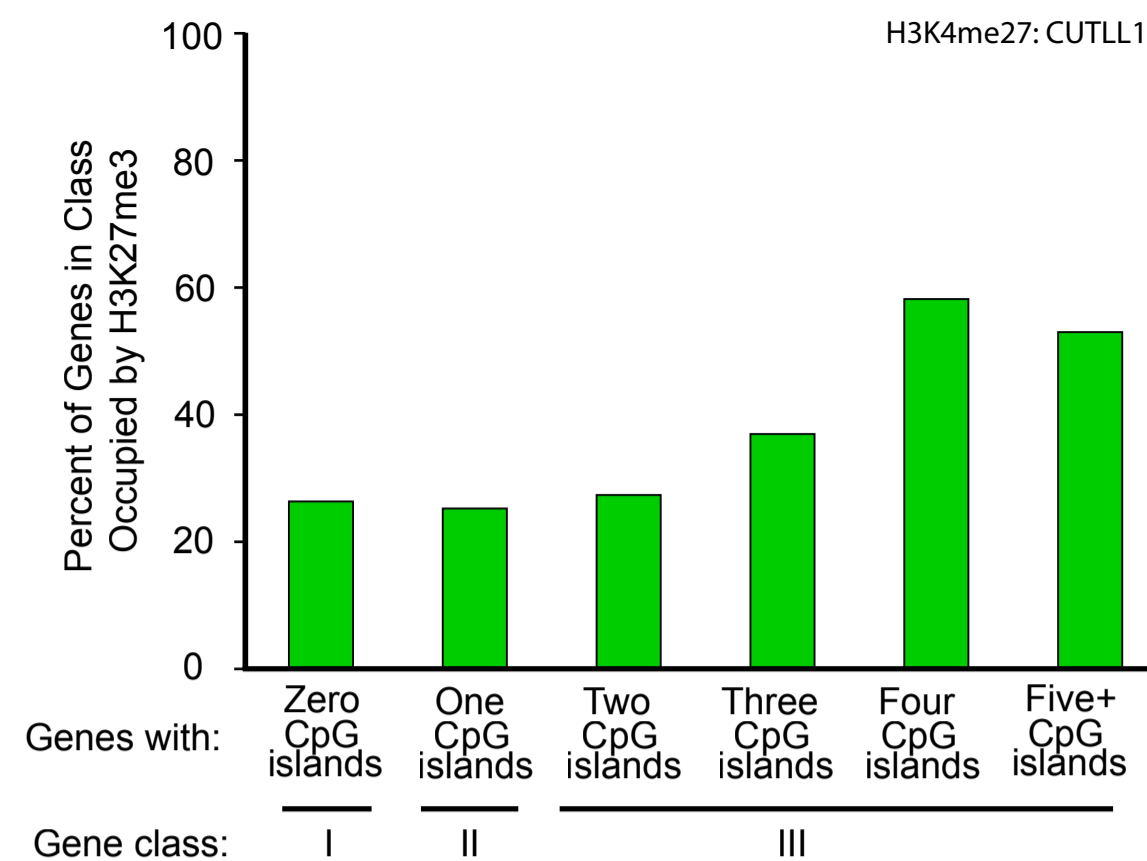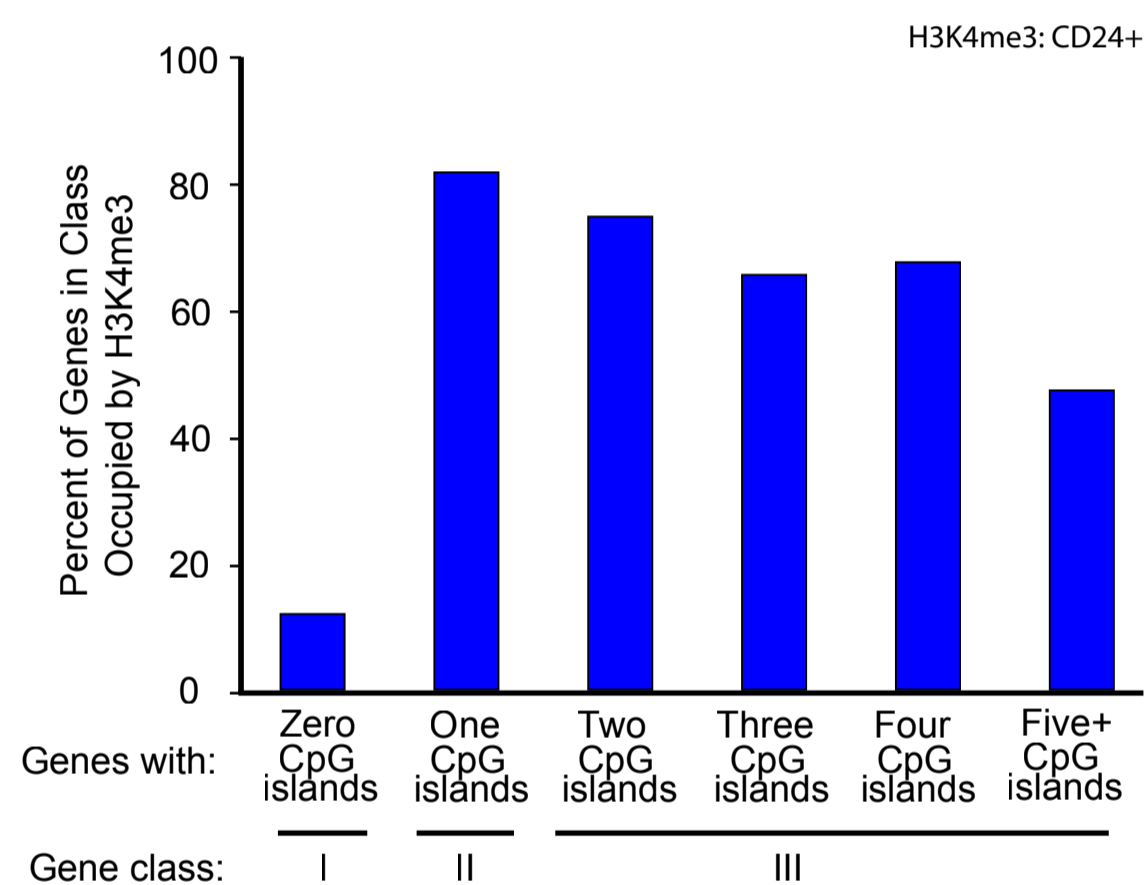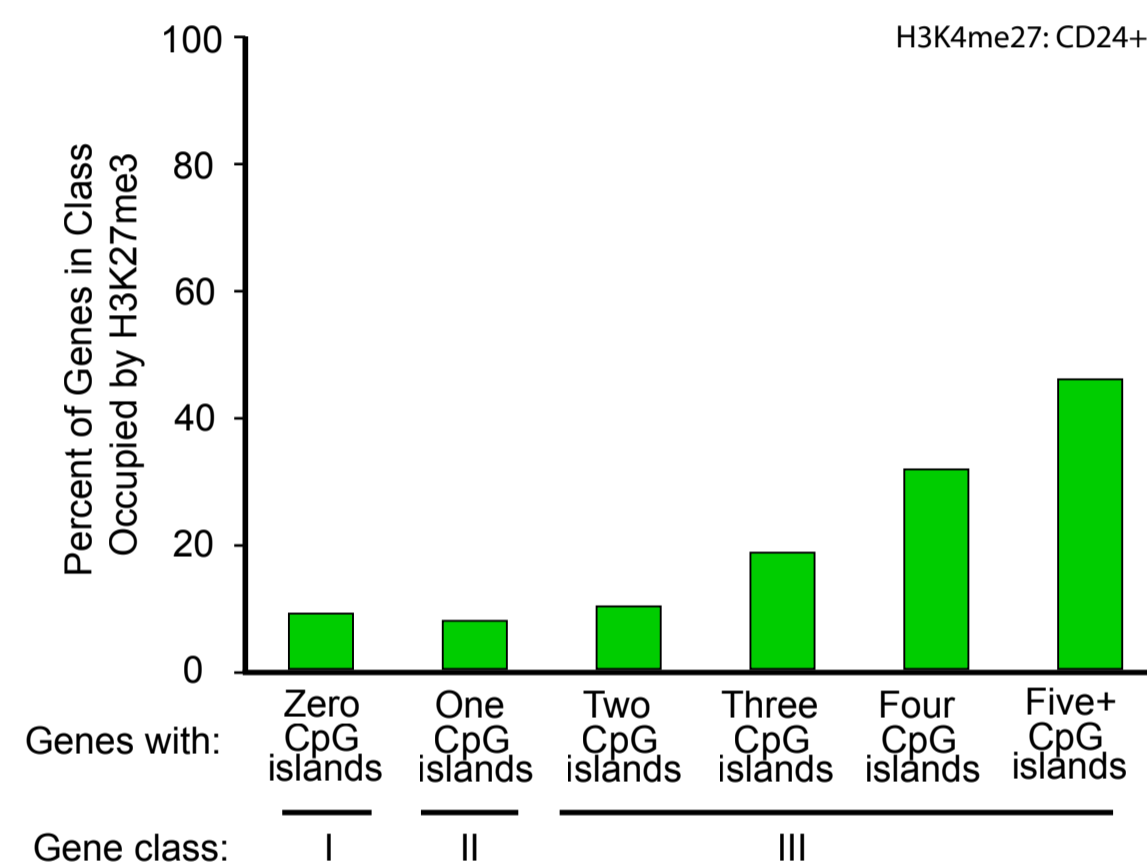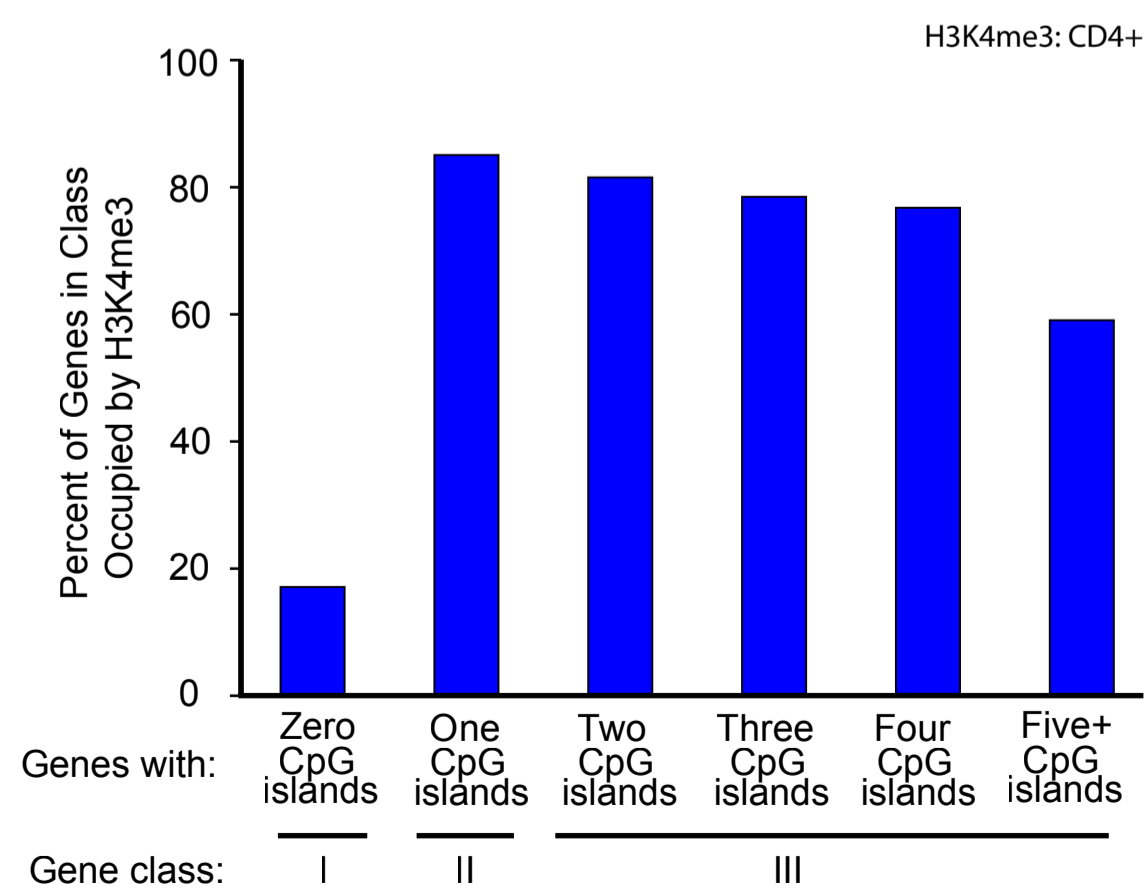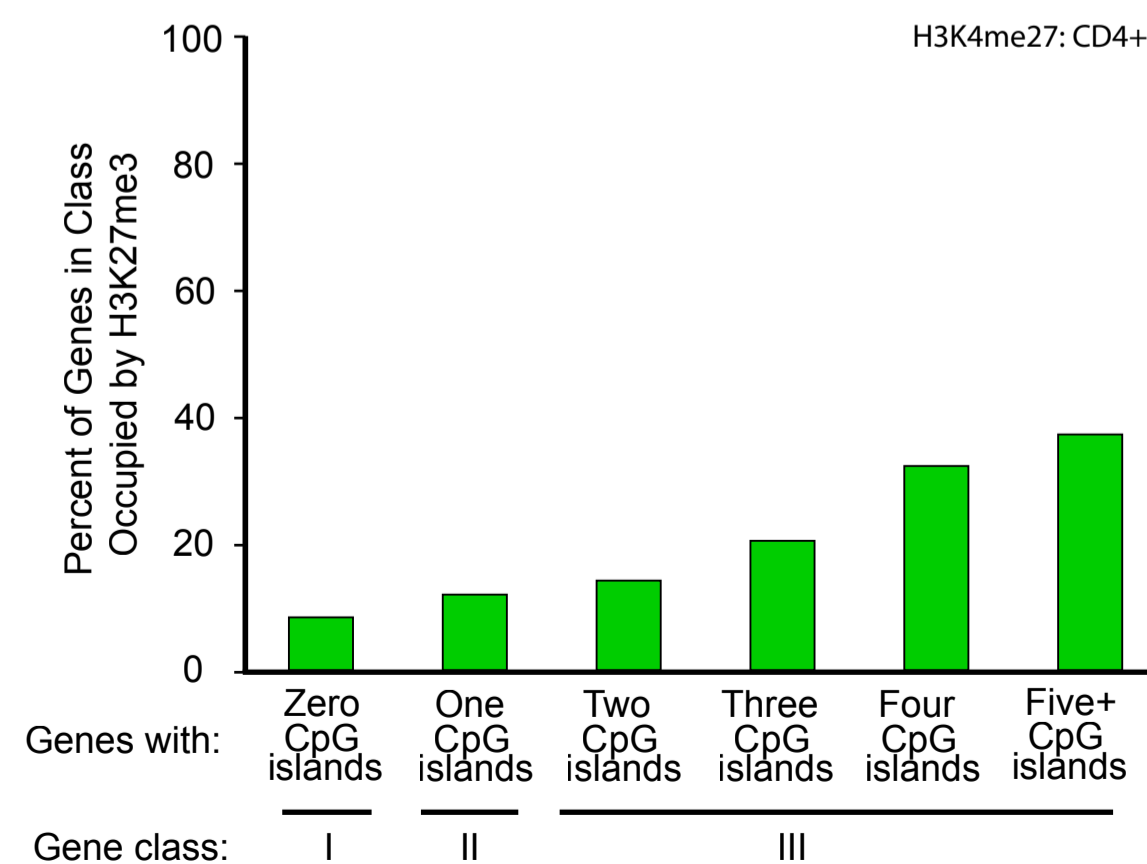

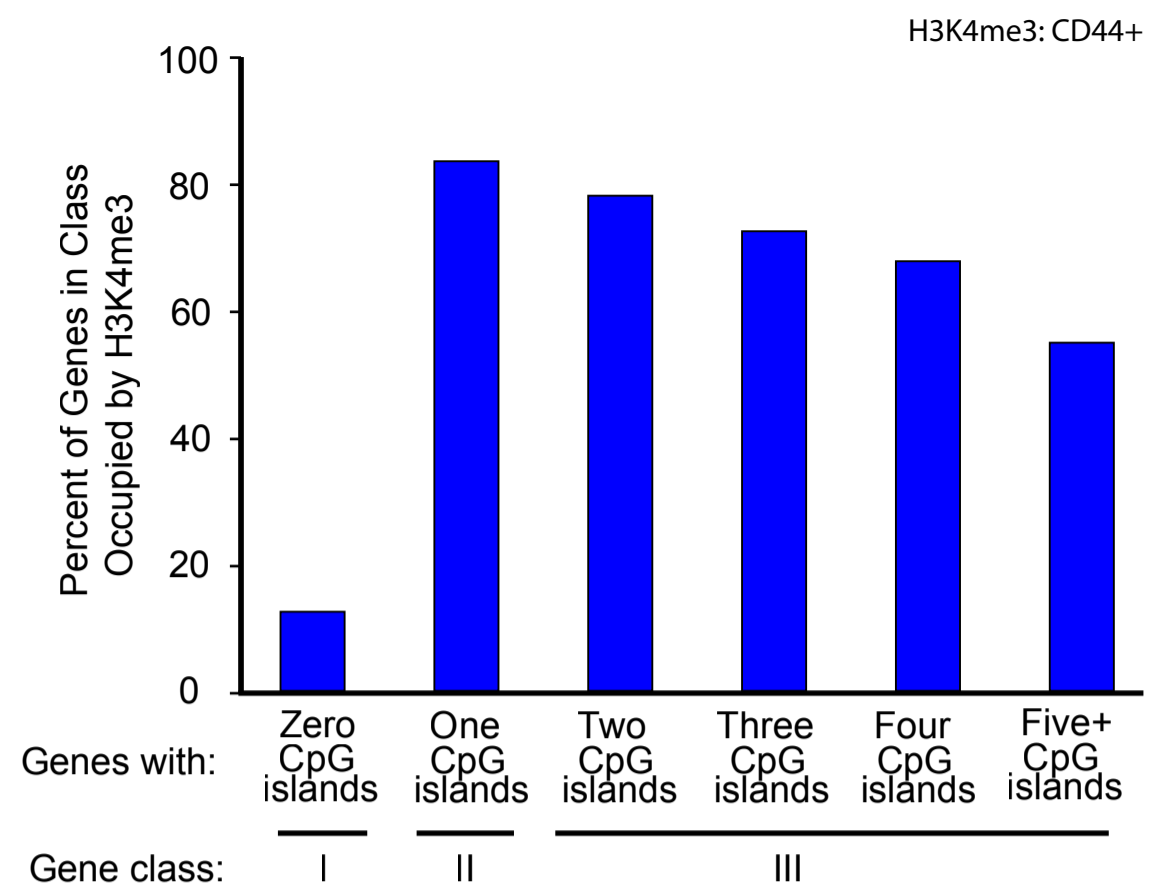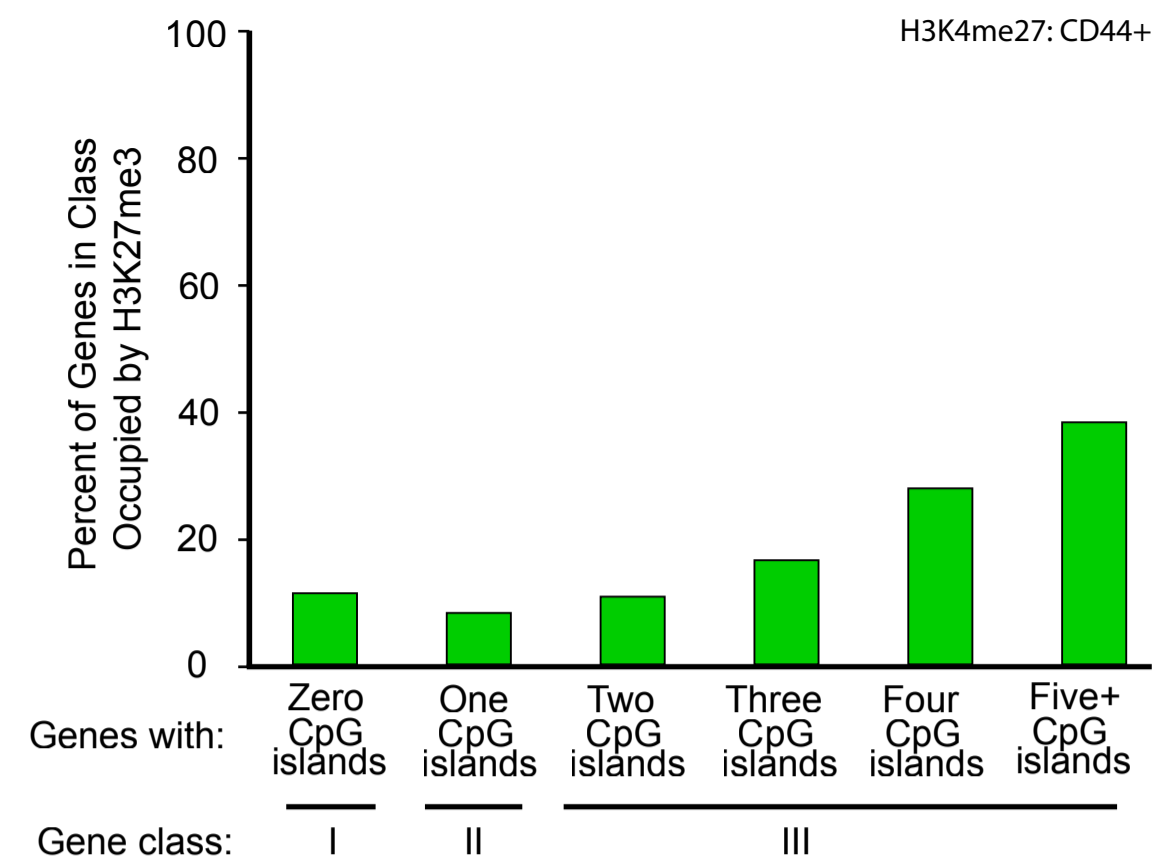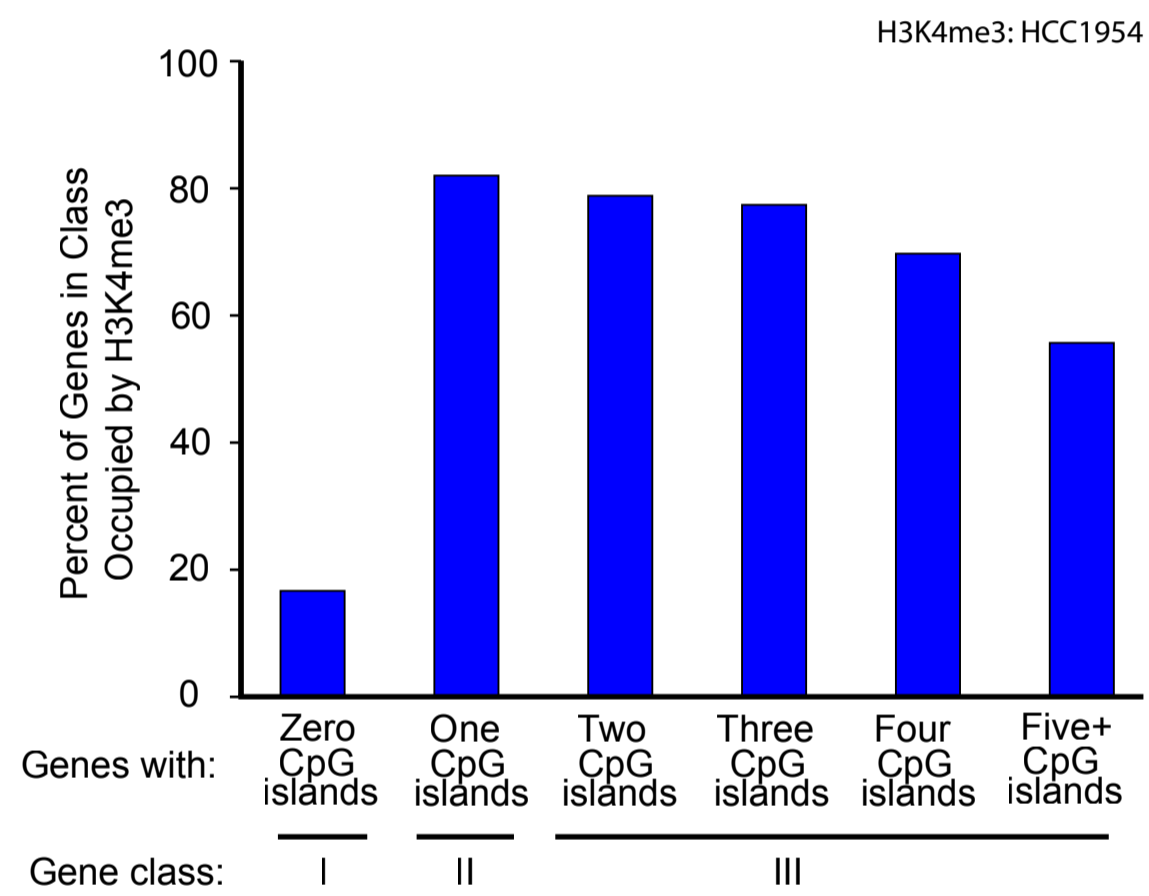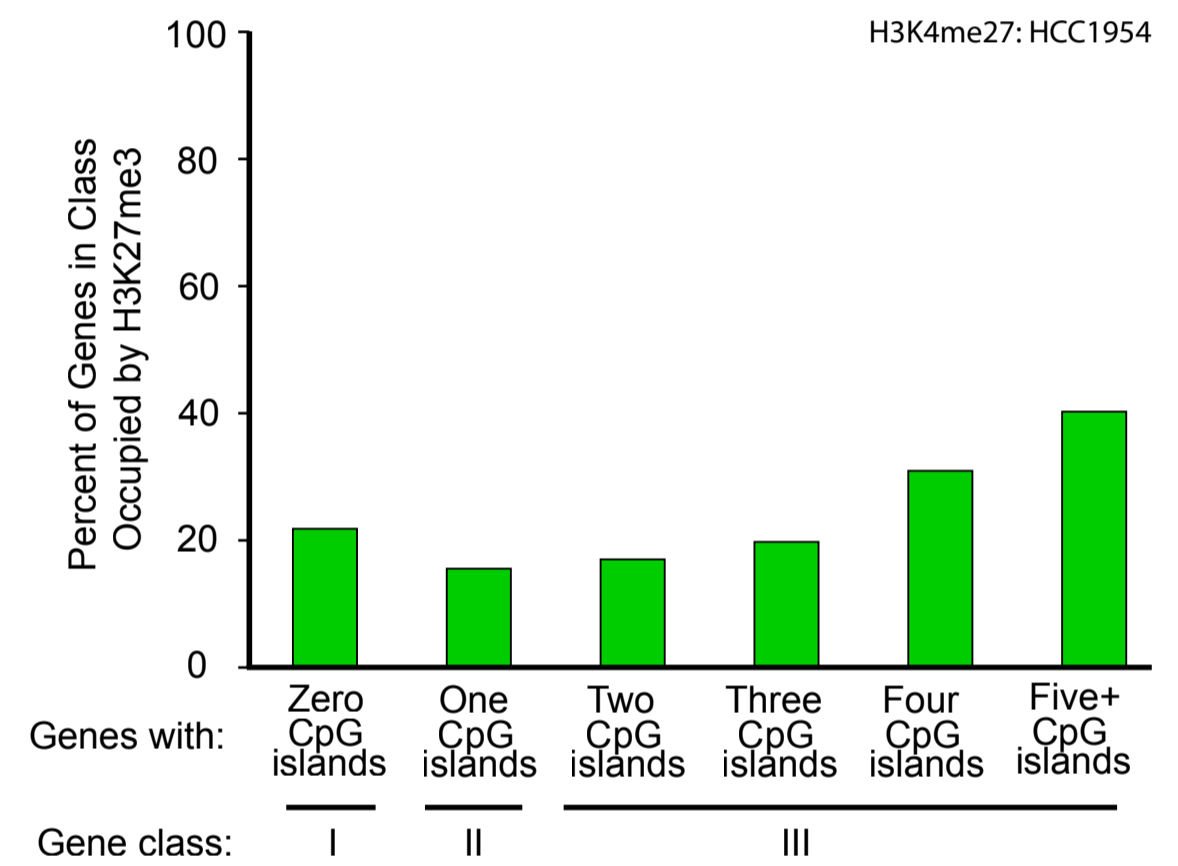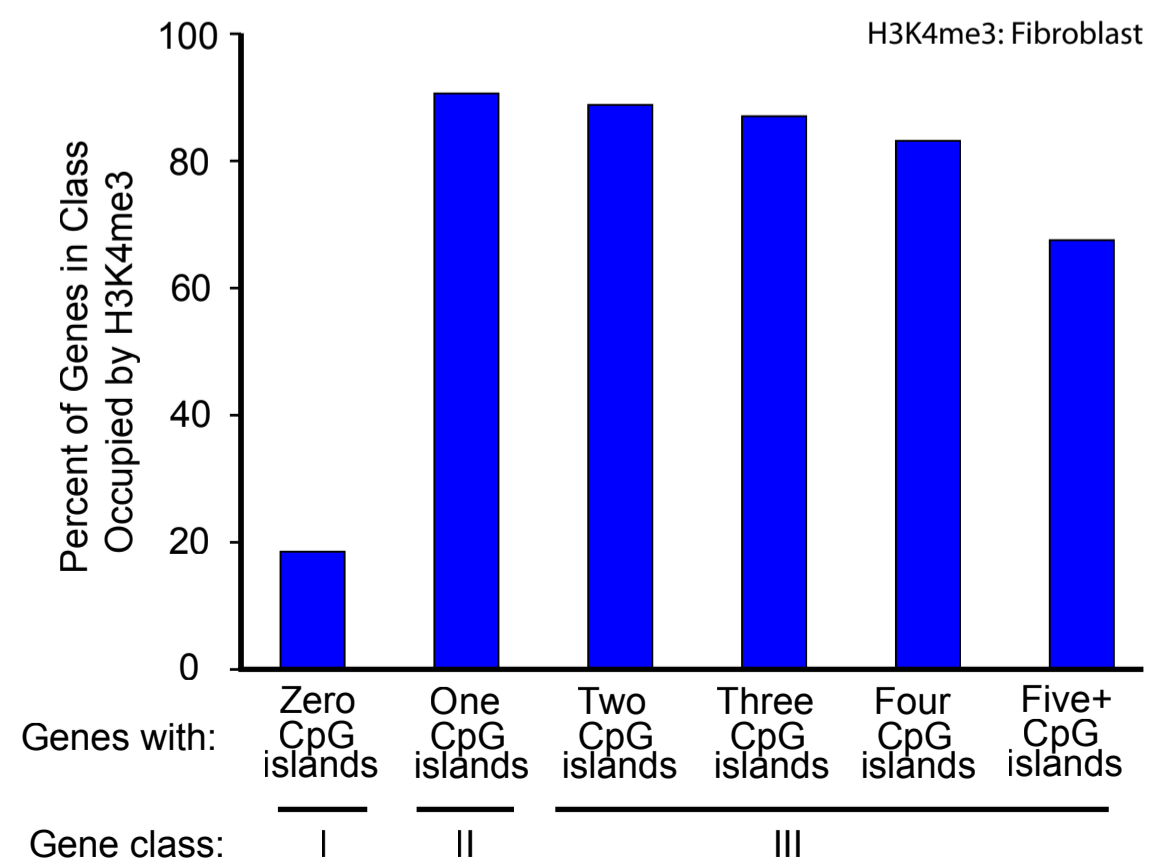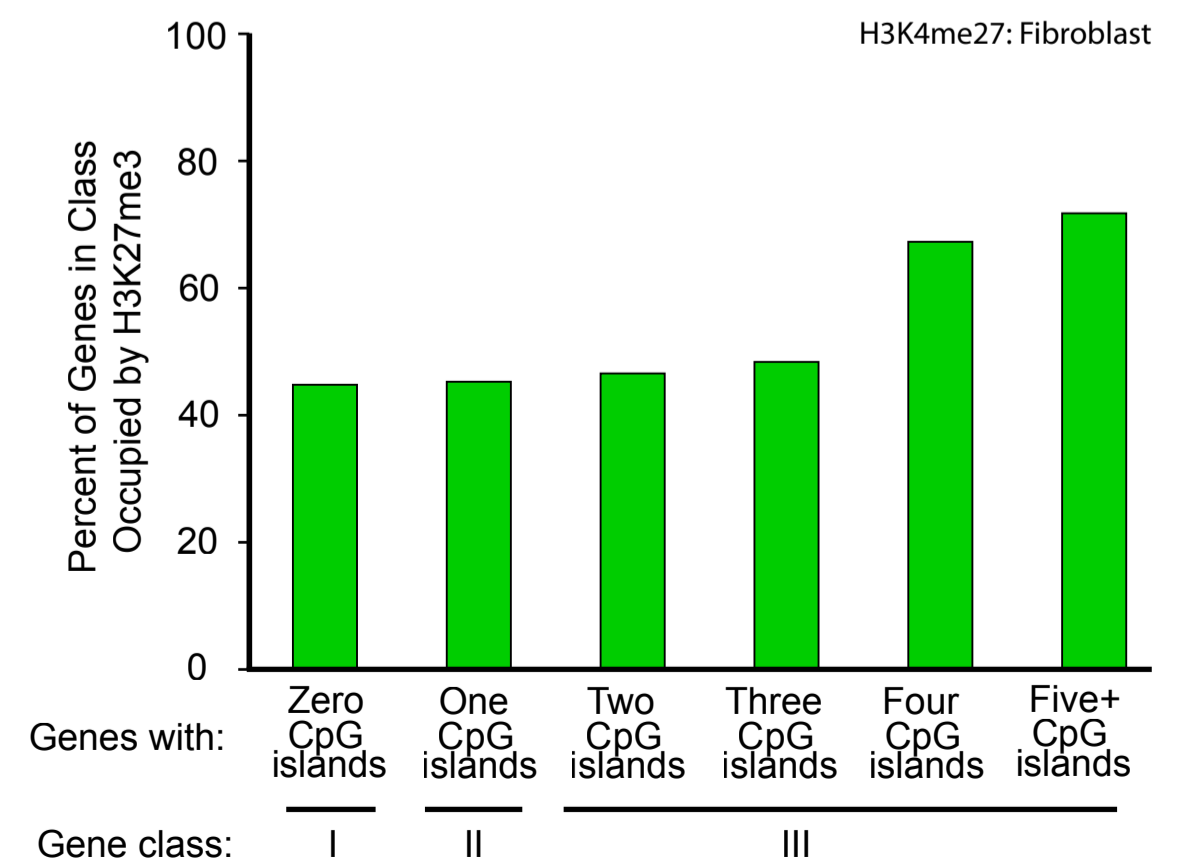

Supplement: NIHMS403526-supplement-06.pdf [file NIHMS403526-supplement-06.pdf]

Figure S3

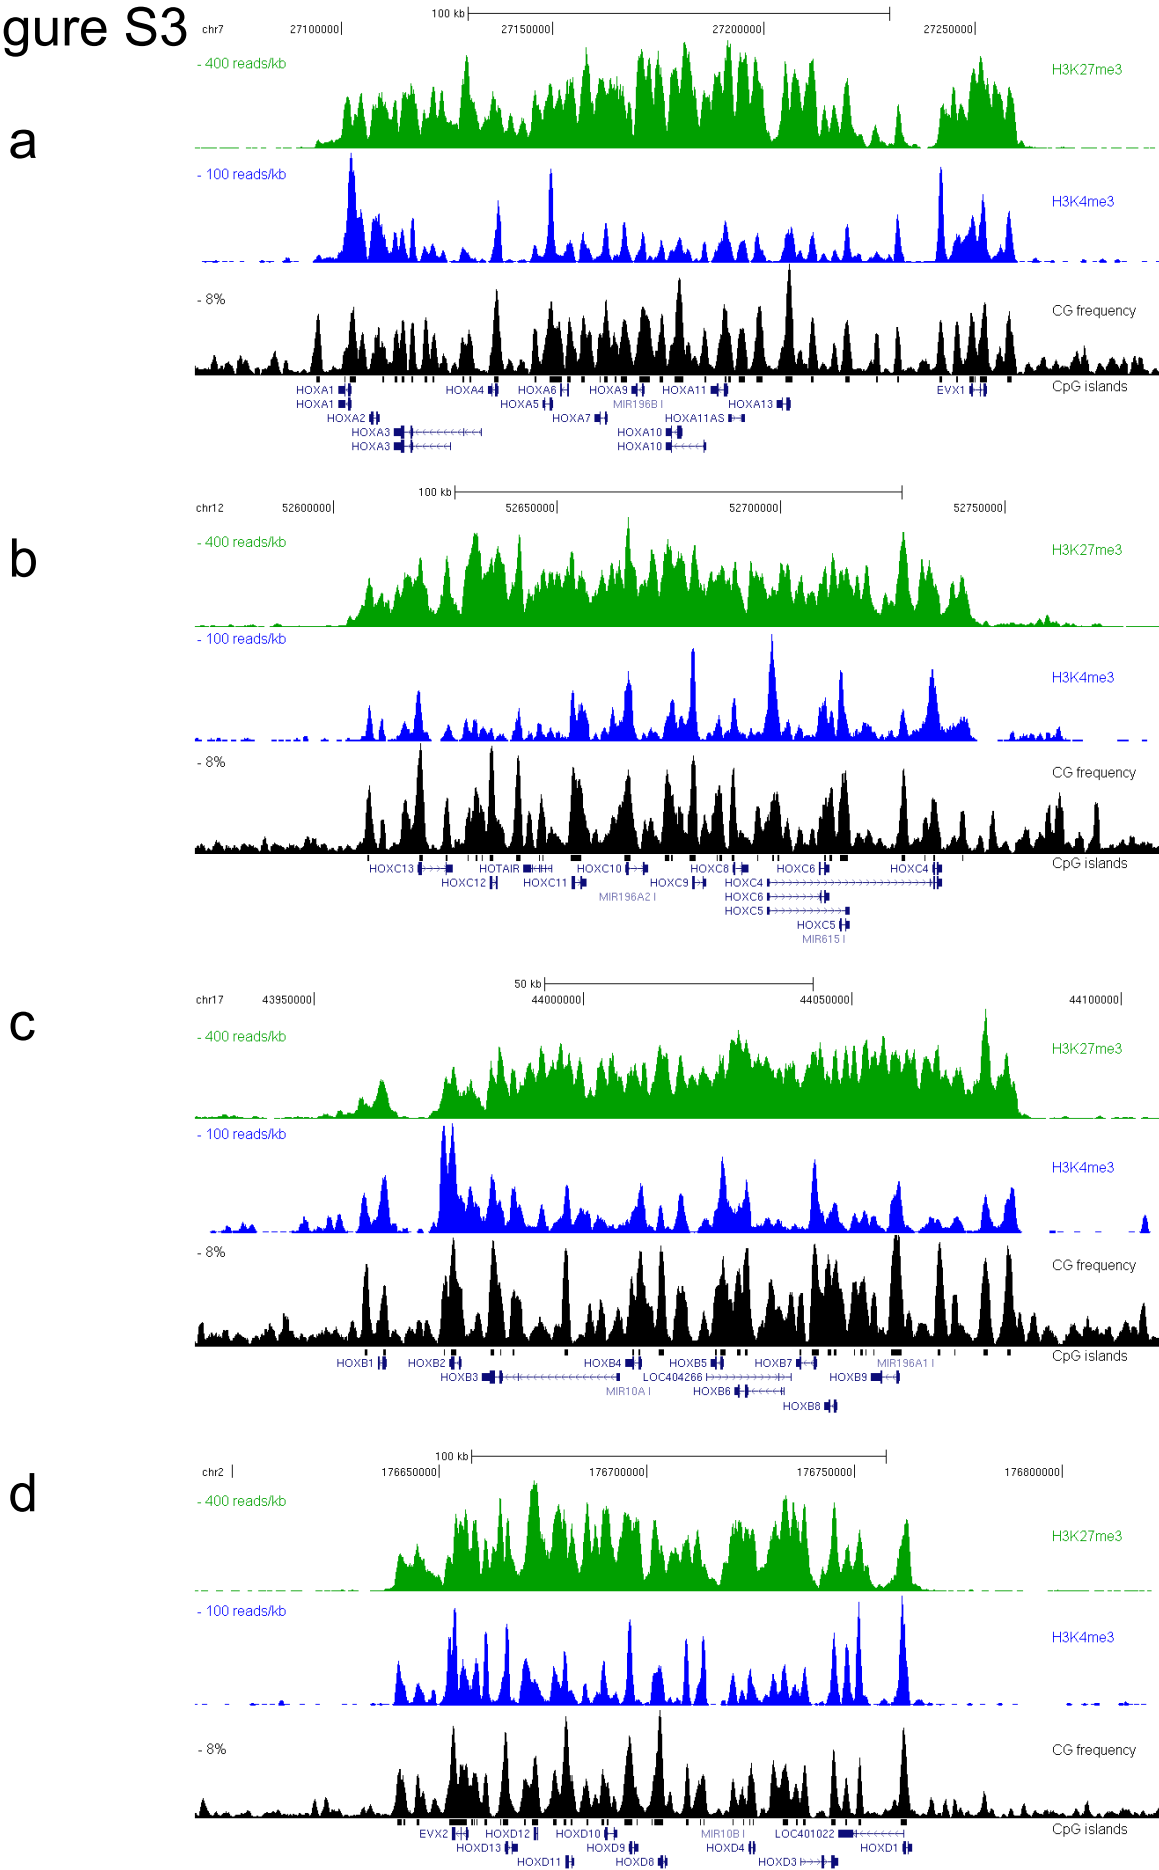

Figure S3

e

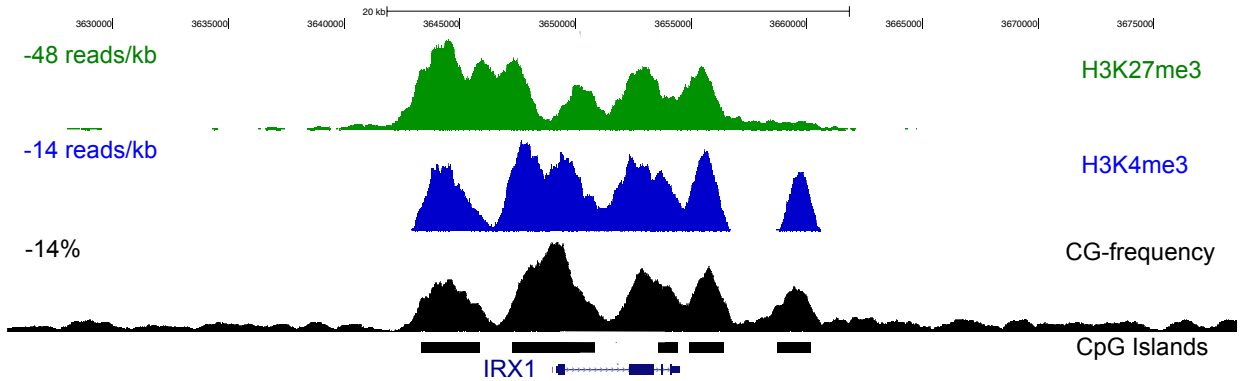

f

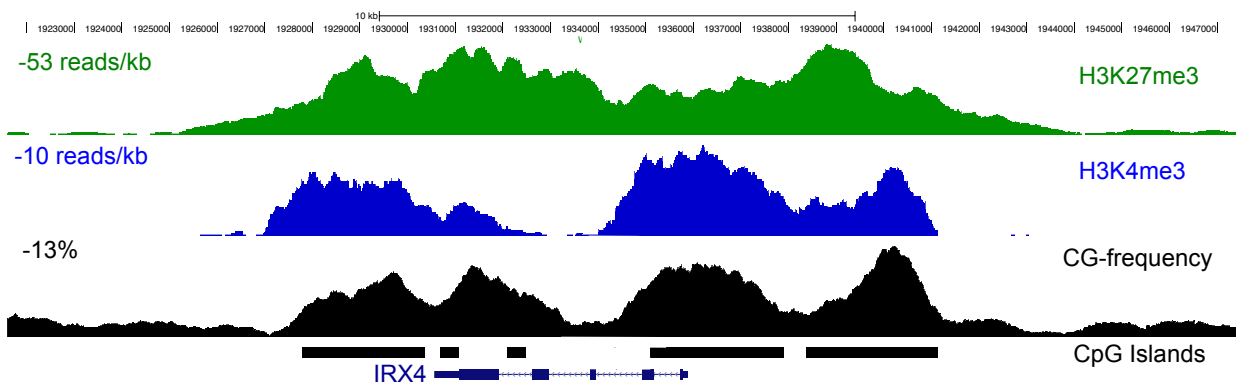

g

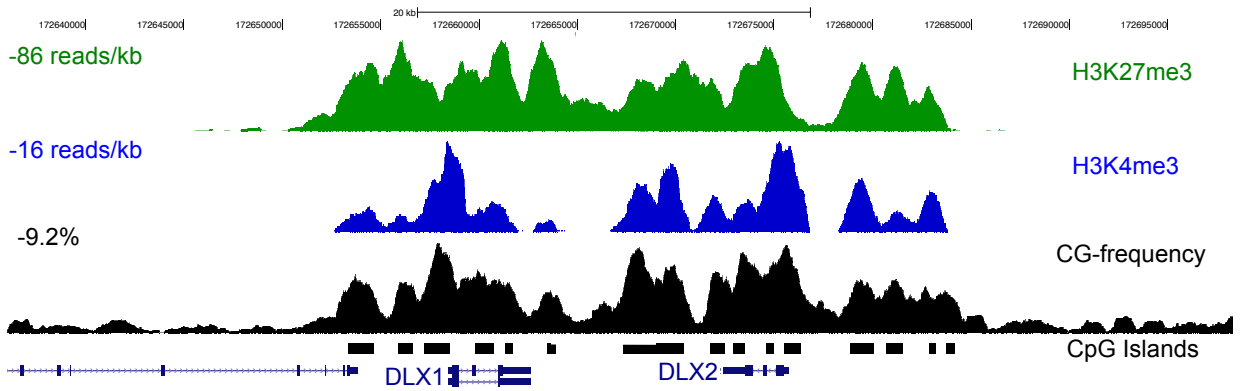

h

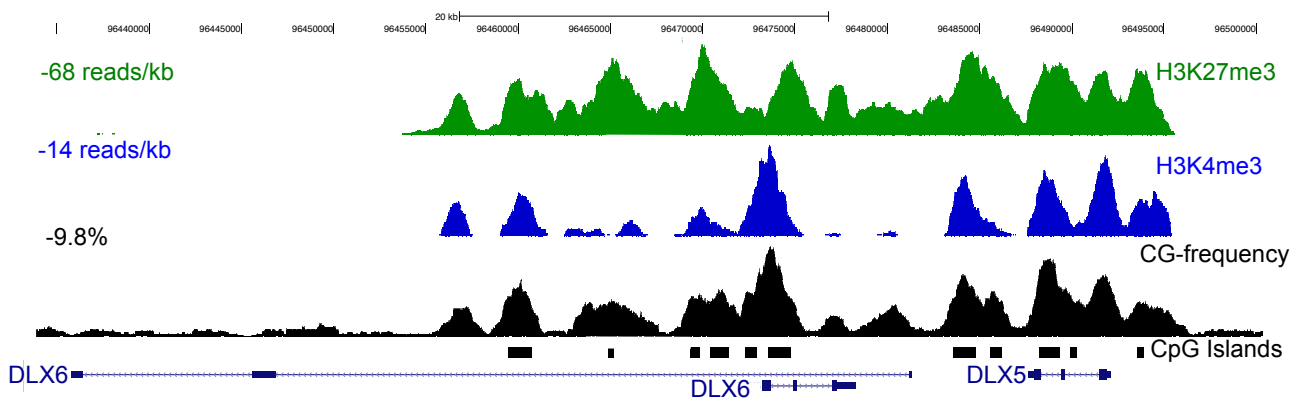

Supplement: NIHMS403526-supplement-07.pdf [file NIHMS403526-supplement-07.pdf]
